# Supplementary material
Source: HighWire-hosted journal article supplement (https://bmjopen.bmj.com/content/8/7/e021961)

**Supplementary Material 1.** Distribution of participant age

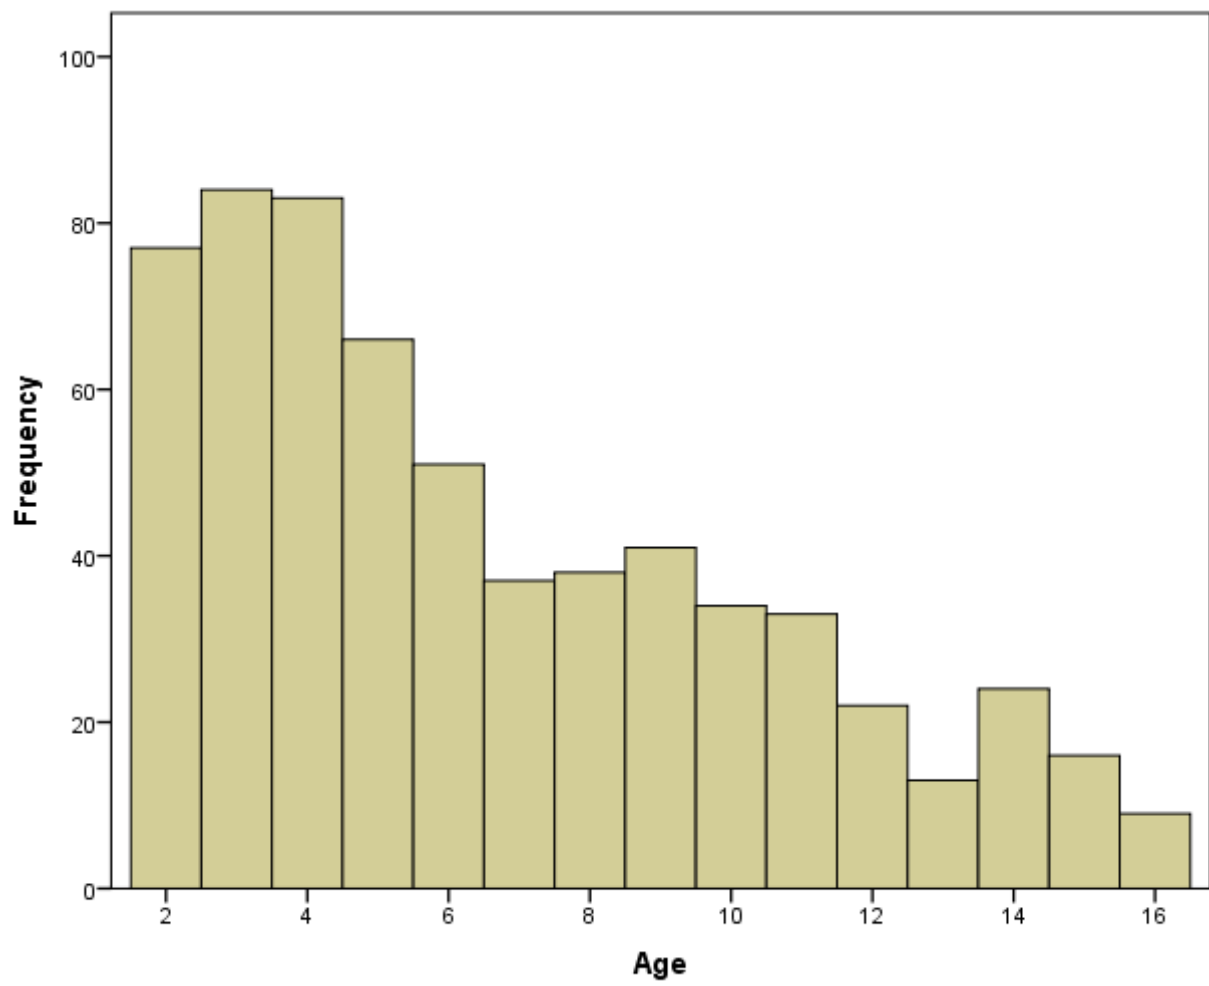

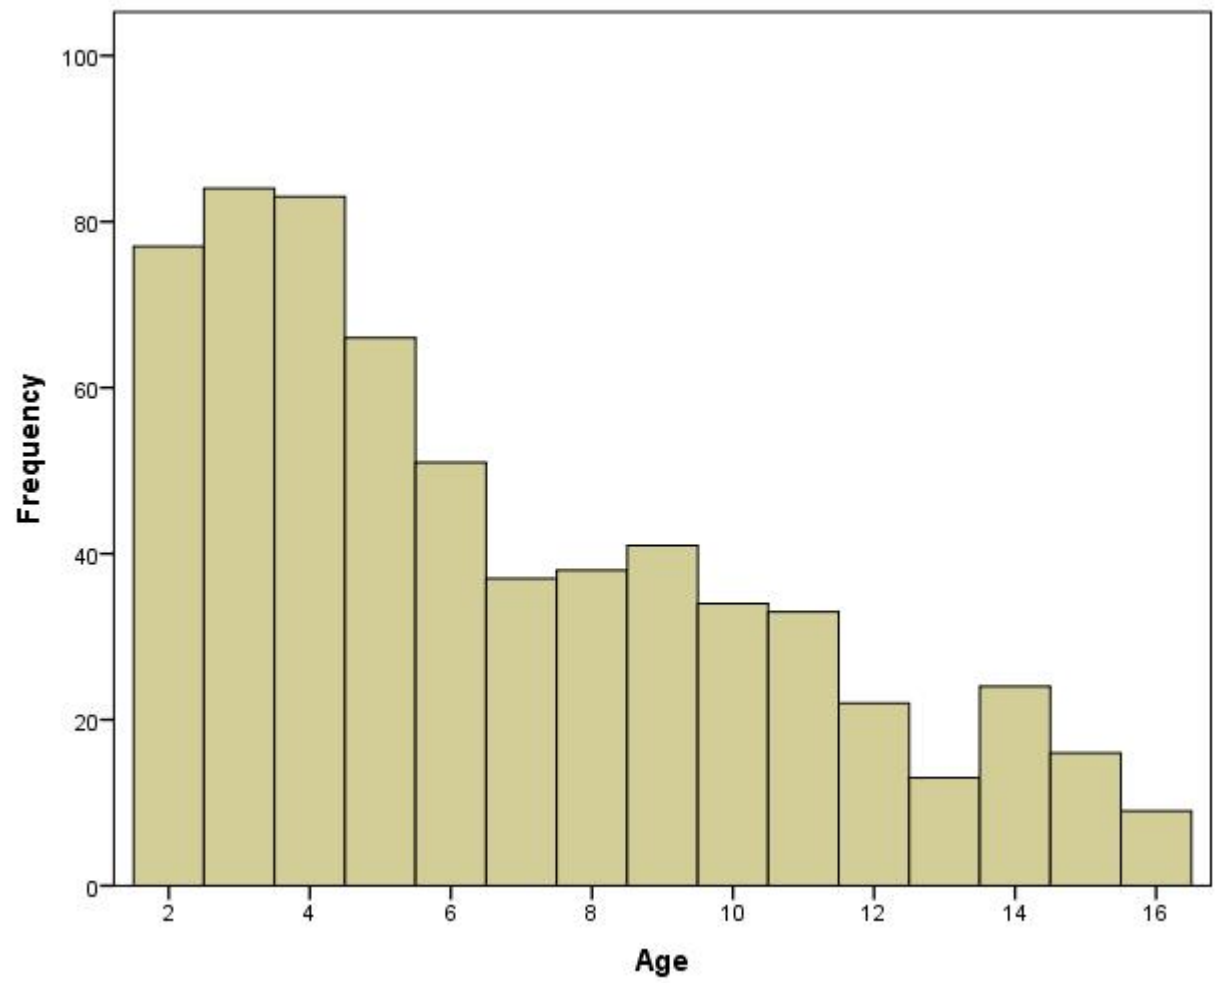

Supplement: inline-supplementary-material-1 [file inline-supplementary-material-1.pdf]
